# Supplementary material
Source: Springer Nature journal article supplement (https://www.springermedizin.de/resource/supplementary/13047_2008_83_MOESM2_ESM.pdf/9663182)

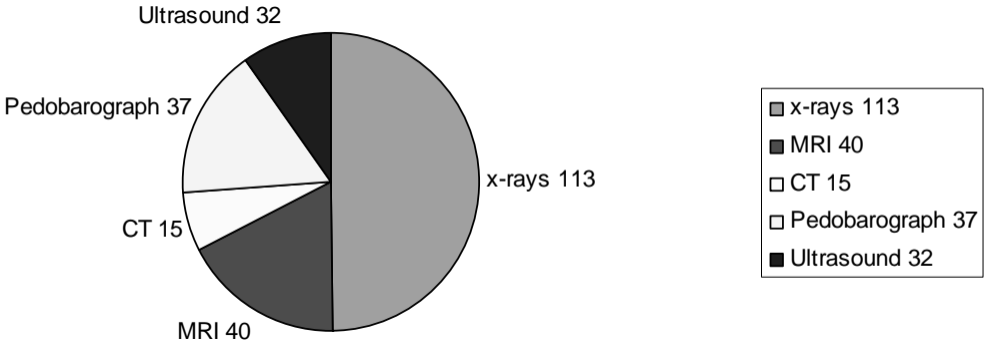

Supplement: MOESM2 [file 9663182]
